# Supplementary material for: Photodynamic inactivation of Escherichia coli by Ru(II) complexes
Source: Royal Society of Chemistry journal article supplement (doi:10.1039/c0pp00275e), 2011-03-29
Supplement: c0pp00275e.pdf [file c0pp00275e.pdf]

## Electronic Supplementary Information

# Photodynamic inactivation of *Escherichia coli* by Ru(II) complexes

Wanhua Lei, Qianxiong Zhou, Guoyu Jiang, Baowen Zhang, Xuesong Wang\*

*Key Laboratory of Photochemical Conversion and Optoelectronic Materials, Technical Institute of*

*Physics and Chemistry, Chinese Academy of Sciences, Beijing 100190, P. R. China.*

## Experimental section

The  $^1\text{O}_2$  quantum yields of the complexes were determined by using  $[\text{Ru}(\text{bpy})_3]^{2+}$  as the reference ( $\Phi = 0.57$  in  $\text{CH}_3\text{CN}$ ) and DPBF (1,3-diphenylisobenzofuran) as the trapping agent of  $^1\text{O}_2$ . The n-Octanol/water partition coefficients ( $\log P$ ) were determined at 25°C using equal volumes of PBS (2 mL) and 1-octanol (2 mL). The final concentrations of Ru complex in aqueous and organic phases were determined by monitoring the absorbance spectroscopy. UV/Vis absorption spectra were recorded on a Shimadzu UV-1601 spectrophotometer. Emission spectra were run on a Hitachi F-4500 fluorescence spectrophotometer. Fluorescent micrograms were performed on a Nikon C1Si inverted fluorescent microscope and the magnification employed was  $10 \times 60$ . The zeta-potentials were measured in PBS suspension on a Malvern Zetasizer 3000HS (Malvern Instruments Ltd.). Transmission electron microscopy (TEM) images were taken by JEOL JEM-2100 LaB6 microscope operated at an accelerating voltage of 200 kV.

A single colony of *E. coli* (JM109) on a solid Luria-Bertani (LB) agar plate was transferred to 8 mL of liquid LB culture medium and was grown at 37 °C for 16 h. Bacteria were harvested by centrifuging at 8000 rpm for 10 min and washing twice

with 5 mM PBS at pH 7.0. The supernatant was discarded and the *E. coli* pellets were resuspended in PBS at a density of  $10^8$ – $10^9$  cells/mL (absorbance of about 0.7 at 650 nm). The phototoxicity of the Ru(II) complexes were determined by incubation with *E. coli* cell suspensions for 10 min in dark at 37 °C and then exposure to an irradiation of > 450 nm for 5 min (using an Oriel 91192 Solar simulator as light source and a 450 nm cut-off filter to remove the short wavelength light). The treated and control (without Ru(II) complex and without irradiation) bacterial samples were diluted  $10^6$ -fold in PBS. Then the diluted *E. coli* suspension (1 mL) was spread on 3M Petrifilm™ *E. coli* Count Plate and incubated at 37 °C for 48 h. The number of colony-forming units (CFU) was counted by a Shinesso G6 Colony Counter. Bacterial killing activity was determined by CFU reduction % (= count of control sample - count of treated sample)/count of control.

**The luminescence turn-on of  $[\text{Ru}(\text{II})(\text{bpy})_2(\text{dppz})]^{2+}$  upon binding to *E. coli***

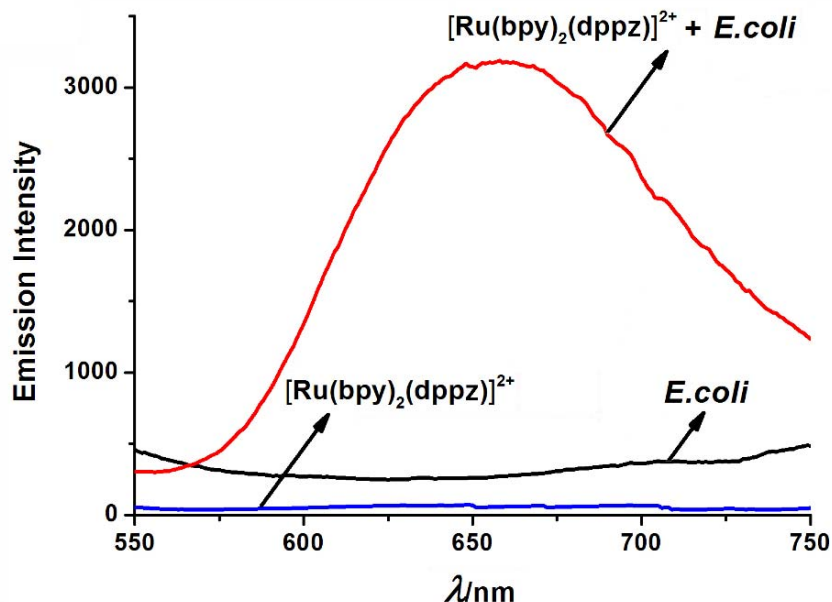

**Figure S1.** Emission spectra of **2** (10  $\mu\text{M}$ ) in PBS in the absence or presence of *E. coli*, excited at 445 nm.

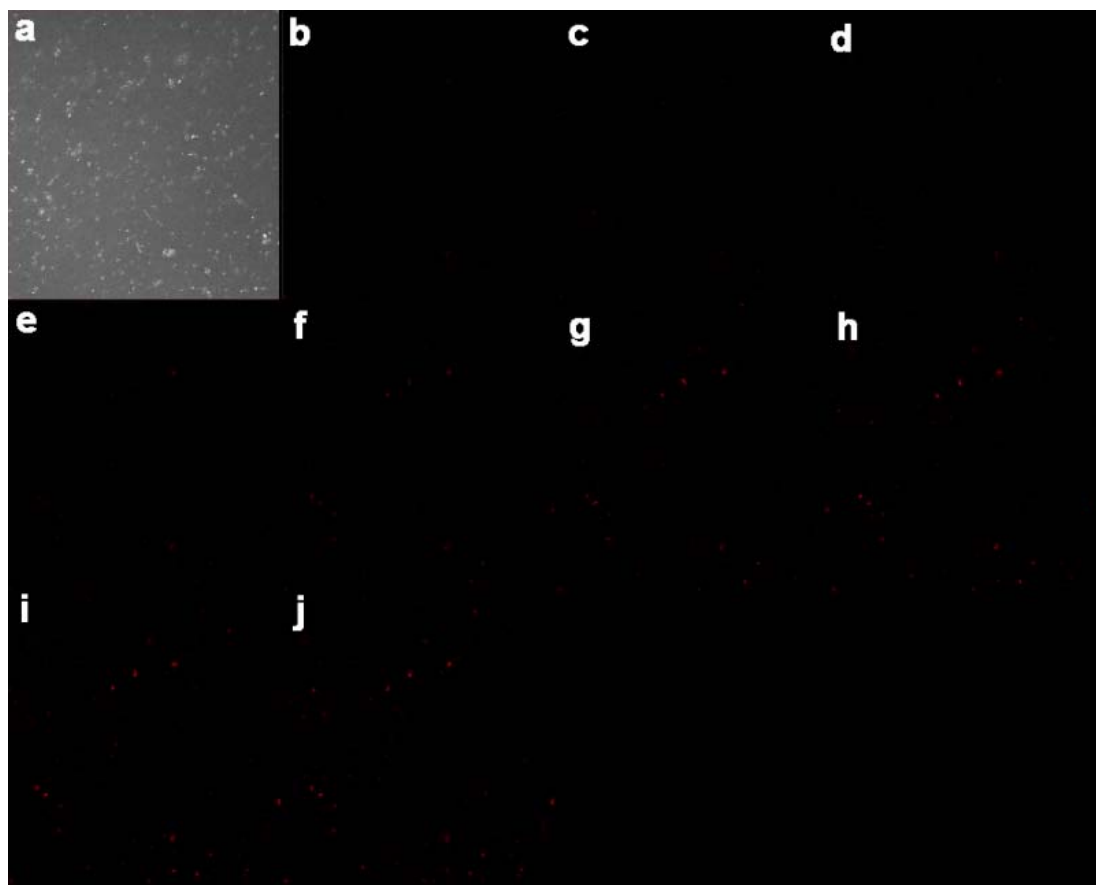

**Figure S2.** The time-dependent binding of complex **2** to *E. coli* membranes. (a) Bright-field microgram and (b)-(j) fluorescence micrograms of *E. coli* incubated with 5  $\mu\text{M}$  **2** ( $\lambda_{\text{ex}} = 488 \text{ nm}$ ), recorded at varied times after addition of **2**: b) 3 min, c) 4 min, d) 5 min, e) 6 min, f) 7 min, g) 8 min, h) 9 min, i) 10 min, j) 40 min.

### $\zeta$ potential measurements

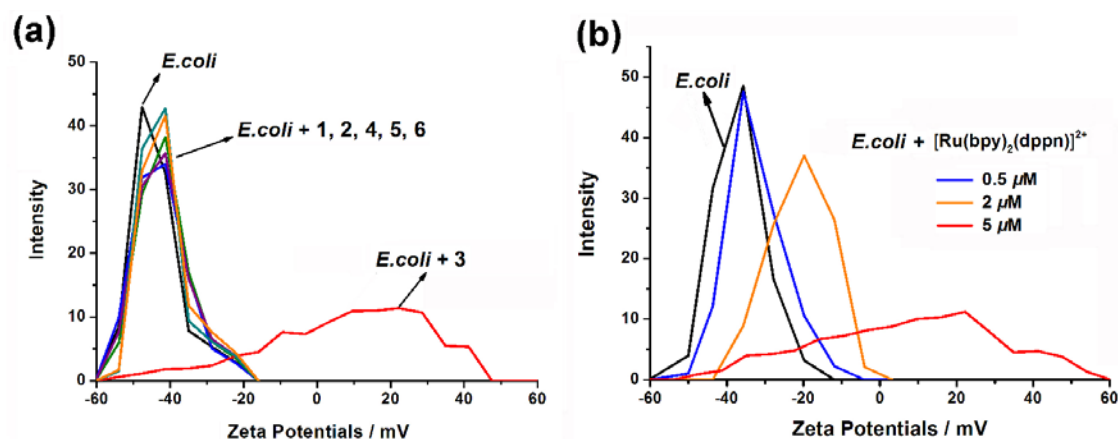

**Figure S3.** (a)  $\zeta$  potentials of *E. coli* in PBS buffer solution in the absence or presence of the Ru(II) complexes (5  $\mu\text{M}$ ); (b)  $\zeta$  potentials of *E. coli* in PBS in the presence of varied concentrations of **3**.

**Table S1.** Zeta potentials of *E. coli* in the absence or presence of the Ru(II) complexes (5  $\mu$ M).

|                     | <i>E. coli</i><br>only | <i>E. coli</i> + Ru complex |       |      |       |       |       |
|---------------------|------------------------|-----------------------------|-------|------|-------|-------|-------|
|                     |                        | 1                           | 2     | 3    | 4     | 5     | 6     |
| Zeta potential [mV] | -43.2                  | -42.6                       | -41.7 | +9.2 | -42.3 | -40.7 | -40.5 |
| $\pm$ [mV]          | 0.4                    | 0.2                         | 0.4   | 3.2  | 0.3   | 0.3   | 0.4   |

### Photoinactivation of *E. coli*

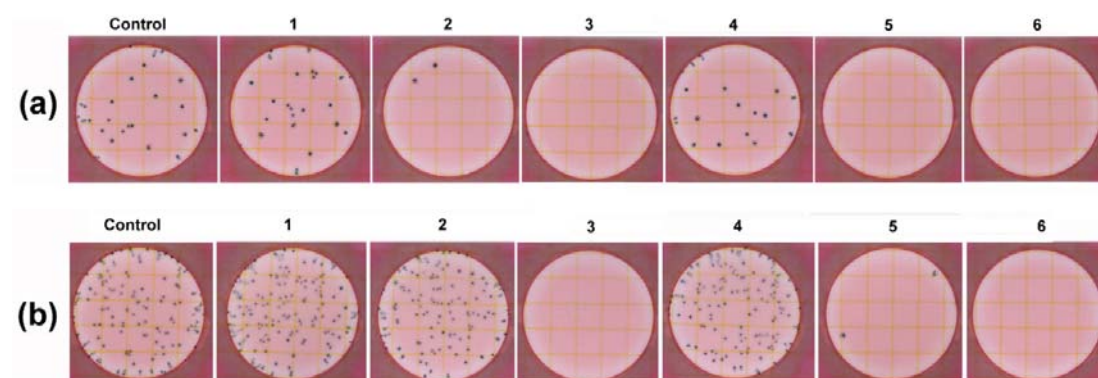

**Figure S4.** Colony forming units (CFU) of *E. coli* on 3M Petrifilm™ *E. coli* Count Plate. (a) *E. coli* suspensions were incubated with the Ru(II) complexes (2  $\mu$ M) and then exposed to visible light (> 450 nm) for 5 min; (b) *E. coli* suspensions were incubated with the Ru(II) complexes (2  $\mu$ M) and then exposed to visible light (> 550 nm) for 10 min. Control experiments were carried out with the cell suspensions irradiated in the absence of the Ru(II) complexes.

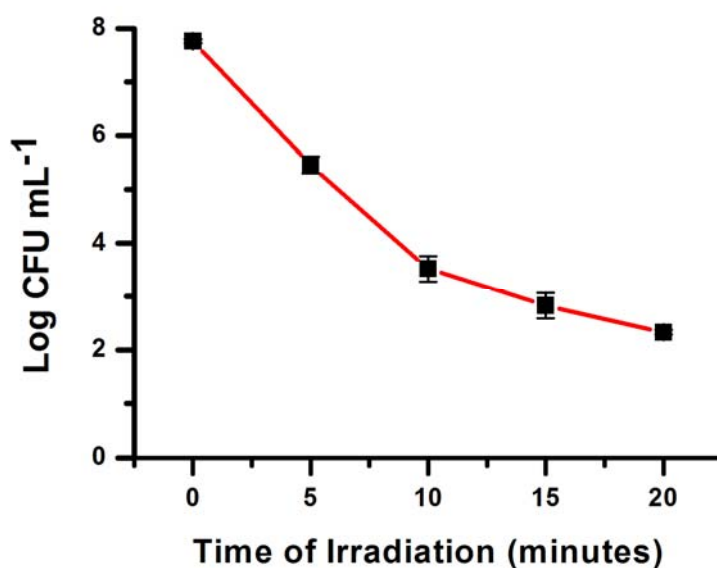

**Figure S5.** Density variation of *E. coli* in the presence of **3** after irradiation for 5, 10, 15, and 20 min, respectively.

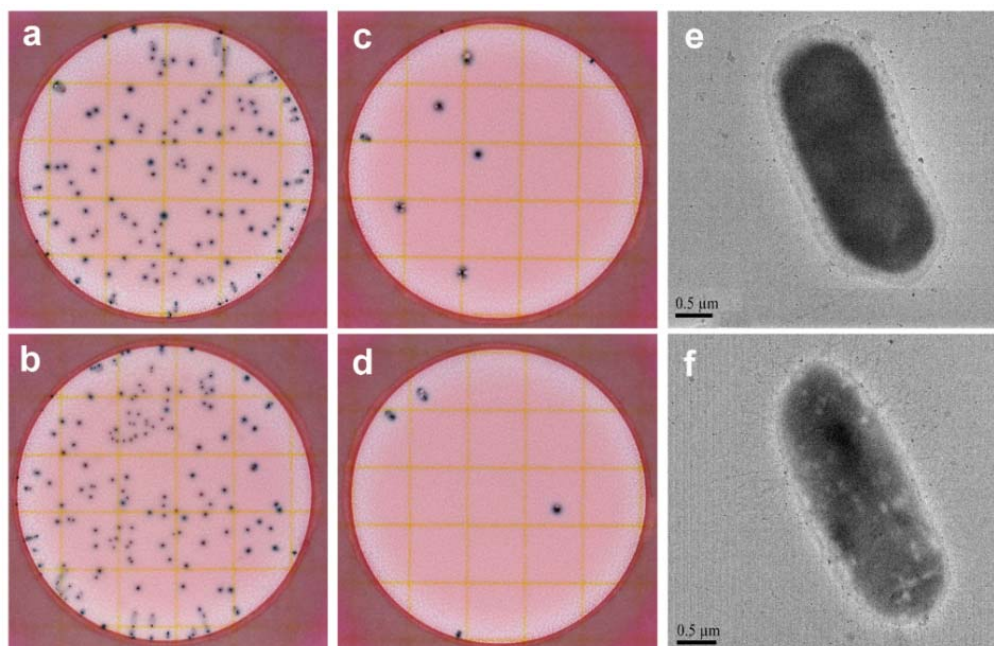

**Figure S6.** Colony forming units (CFU) of *E. coli* on 3M Petrifilm<sup>TM</sup> Count Plate and TEM micrographs of *E. coli* thin sections. (a) CFU count without Ru(II) complex in dark; (b) CFU count incubated with **3** (0.5 μM) in dark; (c) CFU count incubated with TMPyP (0.5 μM) and visible irradiation (> 450 nm) for 5 min; (d) CFU count incubated with **3** (0.5 μM) and visible irradiation (>450 nm) for 5 min; (e) TEM micrograph of *E. coli* cell; (f) TEM micrograph of *E. coli* cell treated under the identical condition of (d)

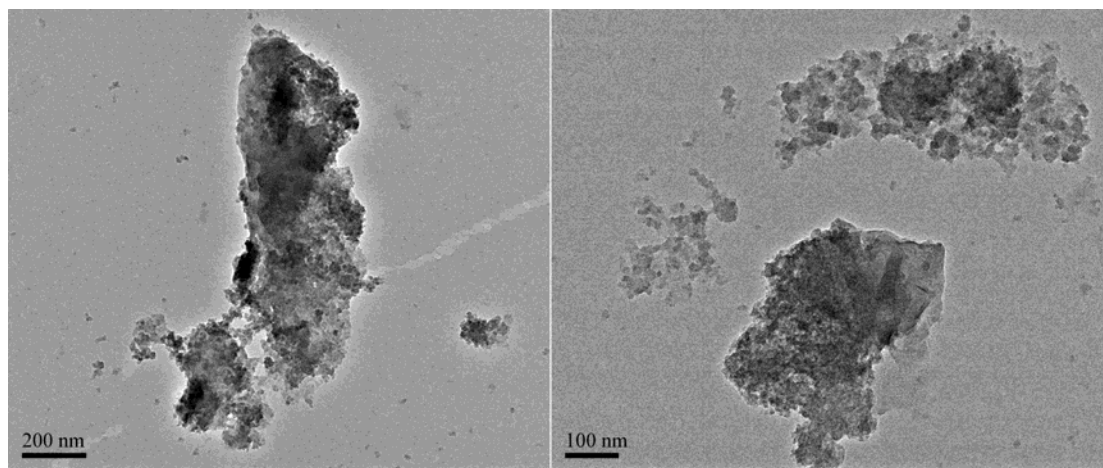

**Figure S7.** TEM micrographs of the disrupted *E. coli* cells treated with complex **3** (0.5 μM) under visible irradiation (>450 nm) for 5 min.
